# Supplementary material for: Enhancing the stability of perovskites by constructing heterojunctions of graphene/MASnI3
Source: Royal Society of Chemistry journal article supplement (doi:10.1039/c9cp06464h), 2020-01-01
Supplement: c9cp06464h1.pdf [file c9cp06464h1.pdf]

# **Enhancing the Stability of Perovskite by Constructing Heterojunction of Graphene/MASnI<sub>3</sub>**

Zihua Hu,<sup>a</sup> Yanli Zeng,<sup>\*b</sup> Xiaoyan Li,<sup>a</sup> and Lingpeng Meng<sup>\*a</sup>

<sup>a</sup> College of Chemistry and Material Science, Hebei Normal University,  
Shijiazhuang, 050024 China

<sup>b</sup> National Demonstration Center for Experimental Chemistry Education, Hebei  
Normal University, Shijiazhuang, 050024 China

Table S1 Atomic Bader charge before and after the adsorption of H<sub>2</sub>O molecule.

| <b>SnI<sub>2</sub>-surface</b>                       | Sn2      |        | I4                                           |                  | H <sub>2</sub> O |       |
|------------------------------------------------------|----------|--------|----------------------------------------------|------------------|------------------|-------|
| <b>Sn site</b>                                       | before   | after  | before                                       | after            | before           | after |
| Charge                                               | 13.06    | 12.98  | 7.49                                         | 7.53             | 8.01             | 7.97  |
| net Charge                                           | 0.94     | 1.02   | -0.49                                        | -0.53            | -0.01            | 0.03  |
| <b>MAI-surface</b>                                   | I15      |        | CH <sub>3</sub> NH <sub>3</sub> <sup>+</sup> |                  | H <sub>2</sub> O |       |
| <b>CH<sub>3</sub>NH<sub>3</sub><sup>+</sup> site</b> | before   | after  | before                                       | after            | before           | after |
| Charge                                               | 7.61     | 7.60   | 14.25                                        | 14.24            | 8.01             | 8.04  |
| net Charge                                           | -0.61    | -0.60  | 0.75                                         | 0.76             | -0.01            | -0.04 |
| <b>heterojunction</b>                                | graphene |        |                                              | H <sub>2</sub> O |                  |       |
| <b>top C site</b>                                    | before   | after  | before                                       | after            | before           | after |
| Charge                                               | 120.02   | 120.01 | 8.01                                         | 8.01             | 8.01             | 8.01  |
| net Charge                                           | -0.02    | -0.01  | -0.01                                        | -0.01            | -0.01            | -0.01 |

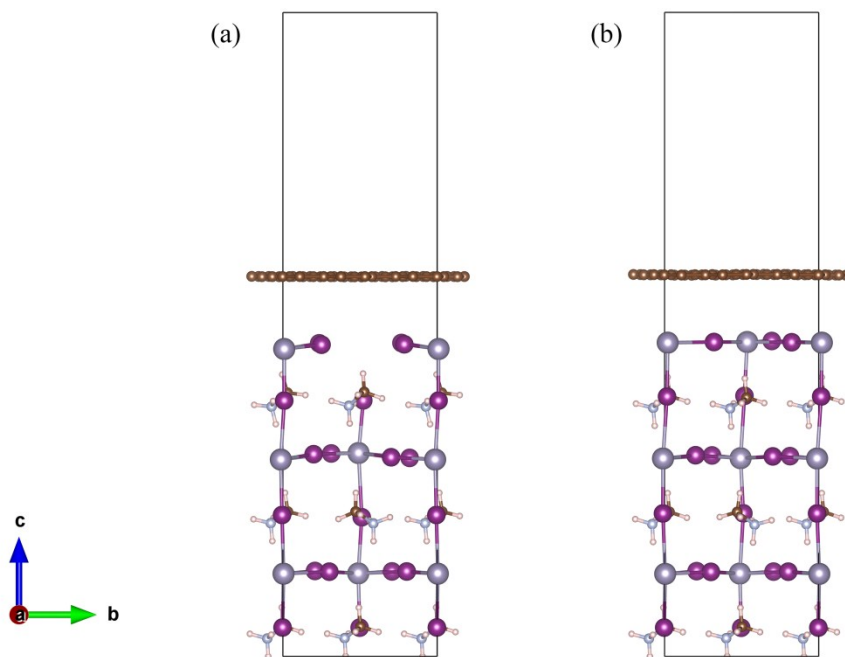

Figure S1 Configurations of heterojunctions with vacancy defect in perovskite surfaces. (a) Sn vacancy defect  $V_{Sn}$ ; (b) I vacancy defect  $V_I$ .

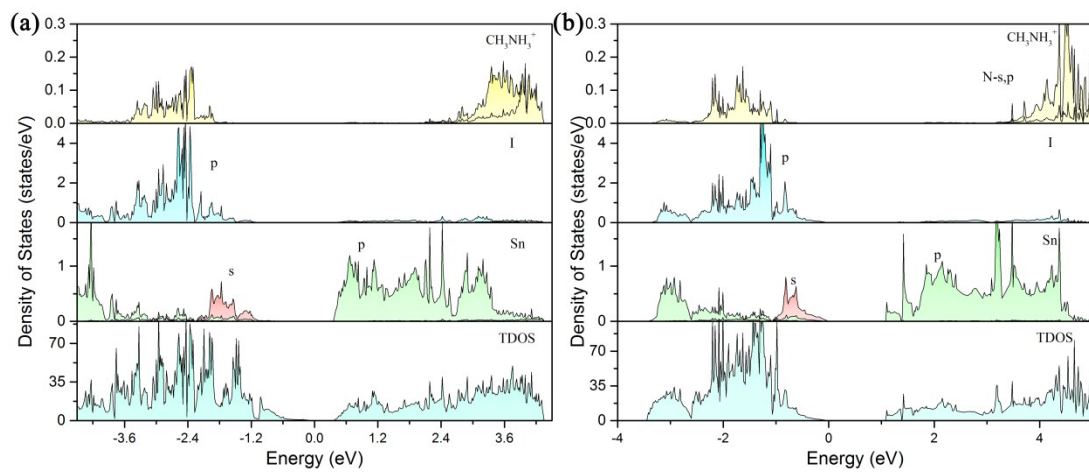

Figure S2 Total and projected DOS of  $\text{SnI}_2$ -terminated (a) and MAI-terminated (b) surface of  $\text{MASnI}_3$ .

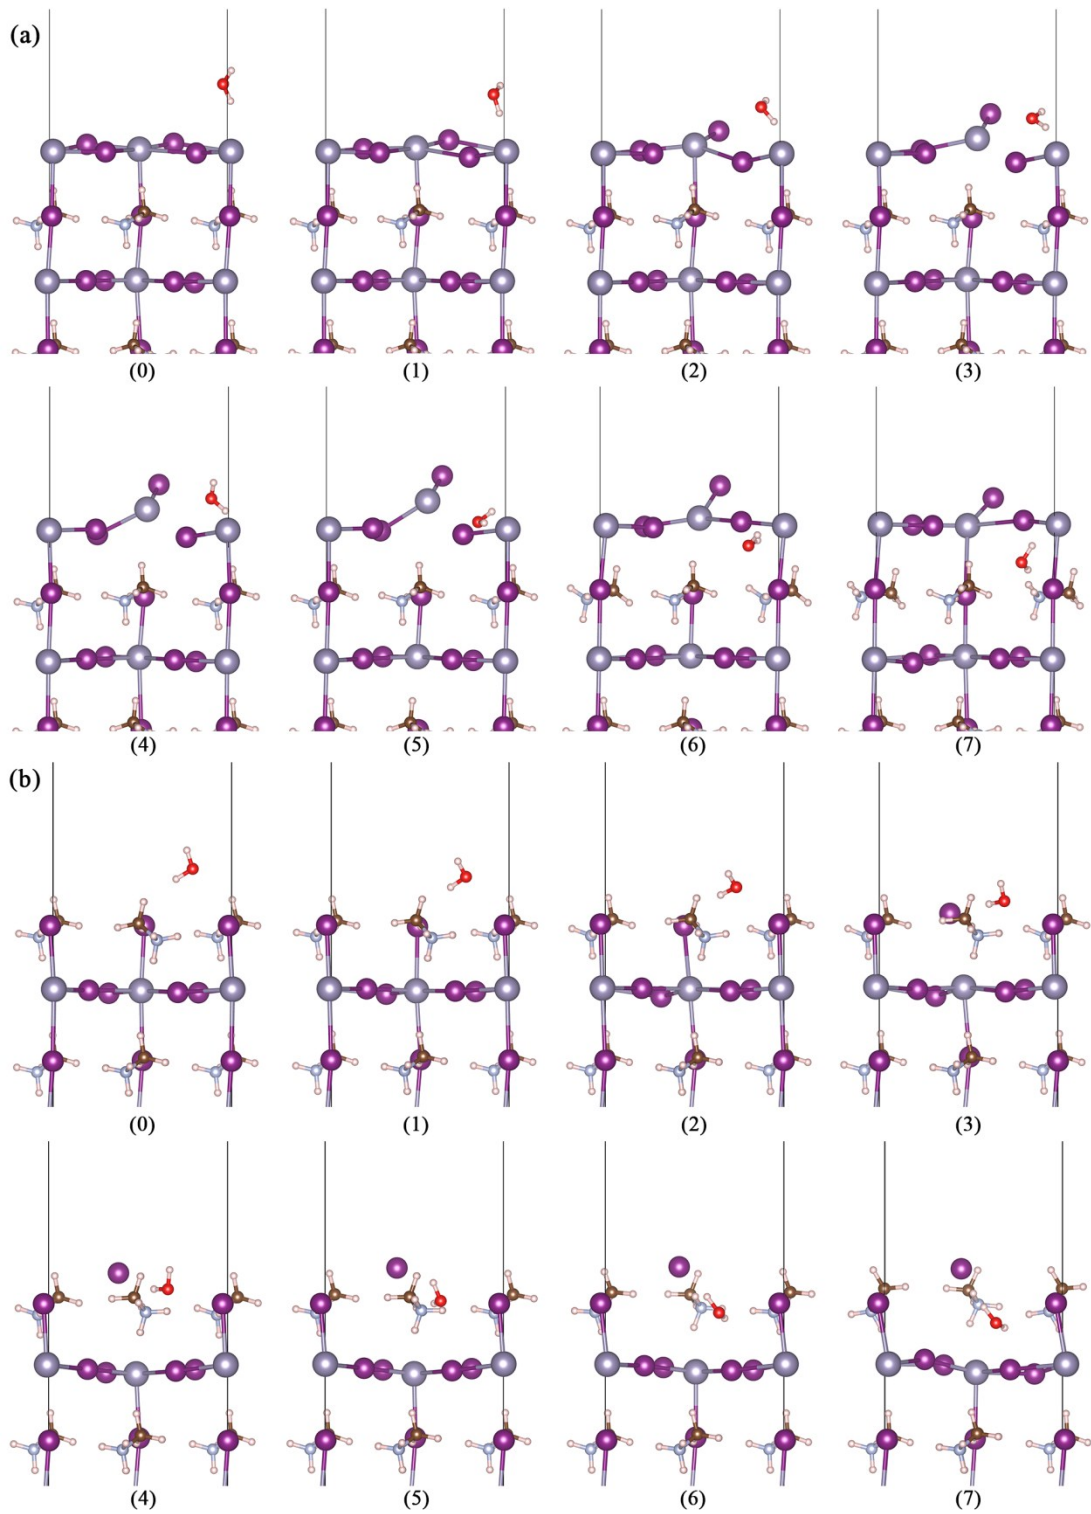

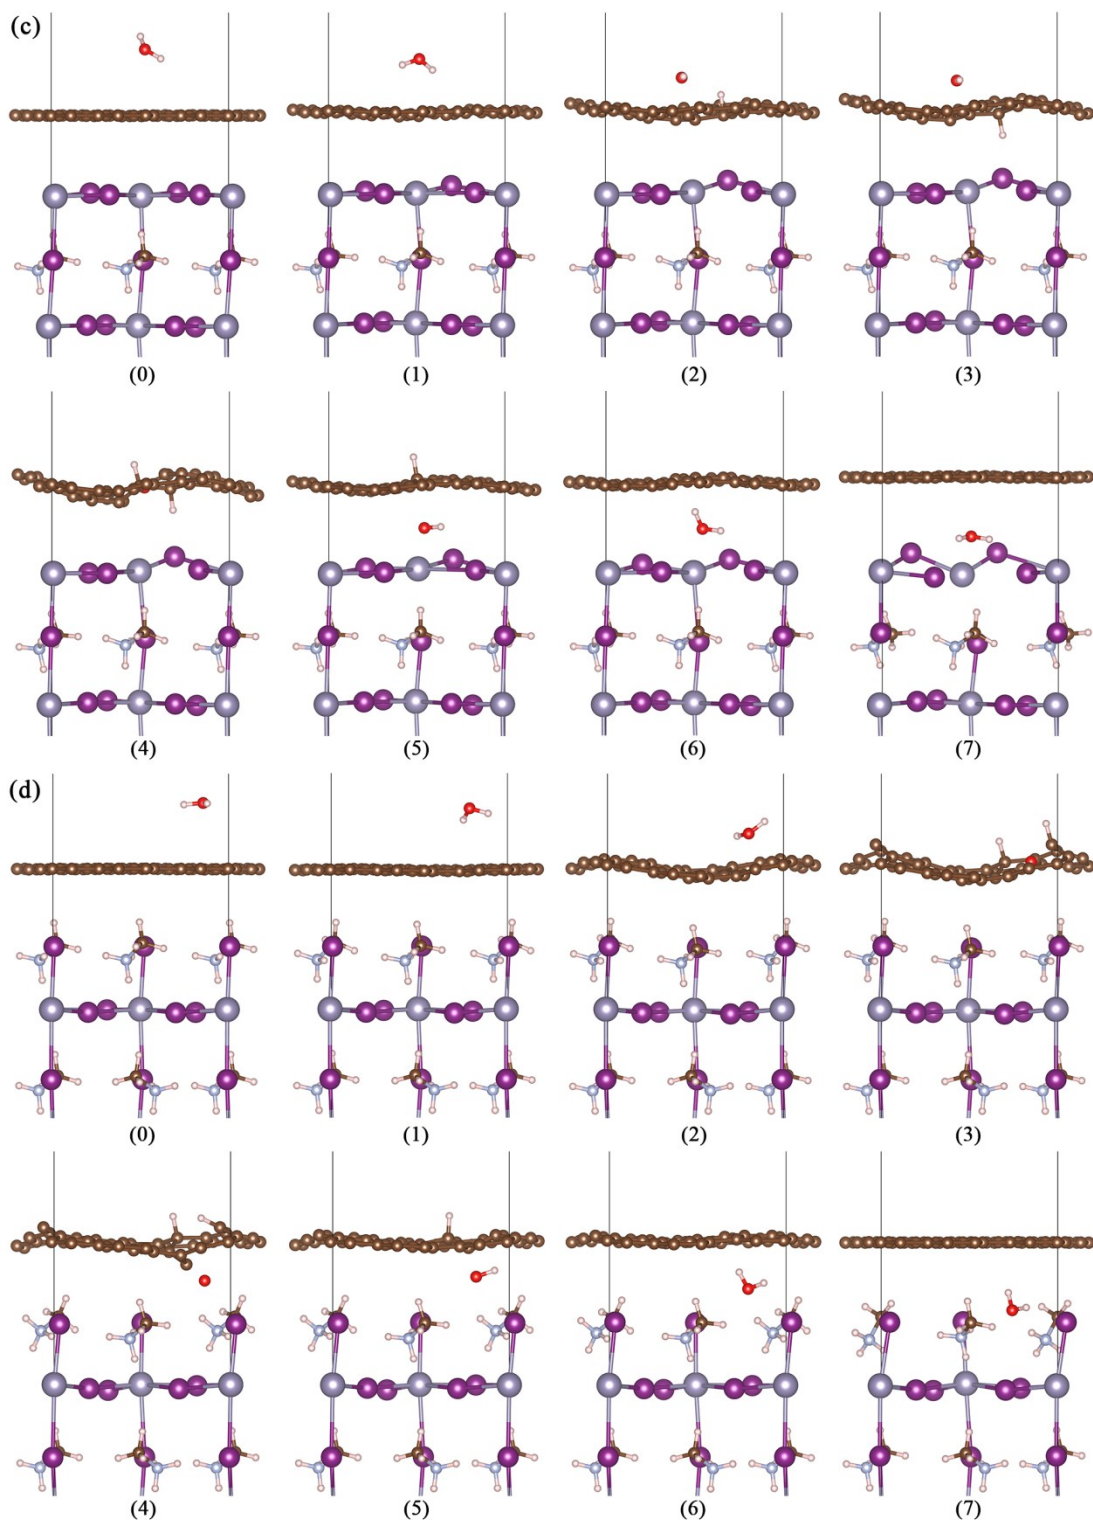

Figure S3 Configurations at the points of diffusion path of  $\text{H}_2\text{O}$  passing through the surface. (a)  $\text{SnI}_2$ -terminated surface of  $\text{MASnI}_3$ ; (b) MAI-terminated surface of  $\text{MASnI}_3$ ; (c) graphene/ $\text{SnI}_2$  heterojunction; (d) graphene/MAI heterojunction.
